# Supplementary material for: High Biofilm Formation of Non-Smooth Candida parapsilosis Correlates with Increased Incorporation of GPI-Modified Wall Adhesins
Source: MDPI journal article supplement (doi:10.3390/pathogens10040493), 2021-04-19
Supplement: s1 [file s1]

## Sheet: S1_All peptides
Supplementary Table S1. MS/MS identification of cell wall proteins in C. parapsilosis.
Protein name(s)	Functional class or family	U/Fa	Bb	Peptide sequence	Ab	Mass (m/z)	CDC317 Exp_30°C		CDC317 Exp_37°C		CDC317 Stat_30°C		CDC317 Stat_37°C		PEU501 Stat_37°C		PEU582 Stat_37°C		PEU582 B_PS		PEU651 Stat_37°C		PEU651 B_PS		PEU486 Stat_37°C		PEU486 B_PS		PEU495 Stat_37°C		PEU495 B_PS		PEU496 Stat_37°C		PEU496 B_PS		PEU586 Stat_37°C		PEU586 B_PS		PEU586 B_Silic.
							Scorec	#c	Score	#	Score	#	Score	#	Score	#	Score	#	Score	#	Score	#	Score	#	Score	#	Score	#	Score	#	Score	#	Score	#	Score	#	Score	#	Score	#	Score	#
CPAR2_404780 (Als11)	Adhesin Als family	U	P	AAPSWIAQLSWK	I	1357																			58	1	54	1			43	1			74	2	73	3	69	8	72	4
CPAR2_404780 (Als11)	Adhesin Als family	U	K	KLTTTANFQGGSNTNPGTSTNNIVFNNR	V	2967																							31	1
CPAR2_404780 (Als11)	Adhesin Als family	U	K	LTTTANFQGGSNTNPGTSTNNIVFNNR	V	2839																			73	1	71	2					38	3					63	2	80	2
CPAR2_404780 (Als11)	Adhesin Als family	U	K	LTTTANFQGGSNTNPGTSTNNIVFNNR Deamidated (NQ)	V	2840																									73	1					58	2	61	2	93	2
CPAR2_404780 (Als11)	Adhesin Als family	U	R	PFLDVLVQRPTGQVLR	T	1837																			46	1	51	2			63	2			58	2			41	1
CPAR2_404780 (Als11)	Adhesin Als family	U	R	PTGQVLR	T	770																			42	1							42	1			44	9	46	4
CPAR2_404780 (Als11)	Adhesin Als family	U	R	SGTLGITVSGGTLDCSSIHSAITNK	L	2475									26	1									77	4	71	8	50	5	83	6	96	7	93	8	79	11	85	14	84	5
CPAR2_404780 (Als11)	Adhesin Als family	U	R	SGTLGITVSGGTLDCSSIHSAITNK Deamidated (NQ)	L	2476																									73	3					50	1			61	2
CPAR2_404780 (Als11)	Adhesin Als family	U	R	TNYINR	Y	779											26	2	42	5					43	34	26	21	47	15	24	13	43	28	25	17	41	20	50	34	50	18
CPAR2_404780 (Als11)	Adhesin Als family	U	R	TPAAPSWIAQLSWK	I	1555											62	1	77	3					98	17	93	15	106	14	94	17	105	22	93	20	90	11	119	15	101	14
CPAR2_404780 (Als11)	Adhesin Als family	U	K	WGEYR	N	709																															24	2			24	2
CPAR2_404780 (Als11)	Adhesin Als family	U	R	YQCAGEIFVR	D	1242																			70	18	58	13	61	12	45	12	62	26	58	14	61	8	63	13	71	9
CPAR2_404790 (Als6)	Adhesin Als family	U	N-term	AQVSGIFTSFNSLTWK	S	1785											48	2							56	1			63	1			87	1
CPAR2_404790 (Als6)	Adhesin Als family	U	R	LIPSLNEAQHYMVSGPCAK	G	2114											23	1									27	1			51	4	87	2
CPAR2_404790 (Als6)	Adhesin Als family	U	R	LIPSLNEAQHYMVSGPCAK Deamidated (NQ)	G	2115																											64	1
CPAR2_404790 (Als6)	Adhesin Als family	U	R	NAAPNYPTWTAVLGWSLDGAK	V	2231																			59	3			70	2			69	2
CPAR2_404790 (Als6)	Adhesin Als family	U	K	QGDYQLGTYDK	F	1287																			53	1	53	1	67	3	29	1	56	2	54	3
CPAR2_404790 (Als6)	Adhesin Als family	U	K	VGQNTVTFTDGSNSISTTANFK Deamidated (NQ)	Q	2289																											63	2
CPAR2_404790 (Als6)	Adhesin Als family	U	K	VNPGDTFTLTMPCVFK	F	1826											71	5	37	2					78	4	77	2	87	4	76	4	66	1	86	2
CPAR2_404790 (Als6)	Adhesin Als family	U	K	VTYINTASCVADTK	Q	1542	90	2	98	1							111	2	64	2					73	2	78	1	102	3	68	1	117	2	78	2
Als7/CPAR2_404800	Adhesin Als family	U	K	FTTTQESIDLDVGDTVYATCR	F	2391																			131	6	57	2	78	7			89	6					78	5	41	1
Als7/CPAR2_404800	Adhesin Als family	U	K	FTTTQESIDLDVGDTVYATCR Deamidated (NQ)	F	2392																			89	1	51	1	54	1
Als7/CPAR2_404800	Adhesin Als family	U	K	KLTTTANFQGGSNTNTDNTPTDDIVYSNR	V	3144																			42	2							50	1
Als7/CPAR2_404800	Adhesin Als family	U	K	KLTTTANFQGGSNTNTDNTPTDDIVYSNR Deamidated (NQ)	V	3145																			75	3
Als7/CPAR2_404800	Adhesin Als family	U	K	LTTTANFQGGSNTNTDNTPTDDIVYSNR	V	3016																											21	1			29	2	80	3	57	2
Als7/CPAR2_404800	Adhesin Als family	U	K	LTTTANFQGGSNTNTDNTPTDDIVYSNR Deamidated (NQ)	V	3017																																	82	2	48	1
Als7/CPAR2_404800	Adhesin Als family	U	R	PFIDILVSVPNGQK	L	1526																					65	2			63	4			55	1			86	5
Als7/CPAR2_404800	Adhesin Als family	U	R	PFIDILVSVPNGQK Deamidated (NQ)	L	1527																			67	2	95	4			74	3	49	1	108	5	112	4	93	7	82	6
Als7/CPAR2_404800	Adhesin Als family	U	K	QQLYLLGGTCSNGYR	S	1729																			76	2	36	1	33	1			63	1	39	1
Als7/CPAR2_404800	Adhesin Als family	U	K	QQLYLLGGTCSNGYR Deamidated (NQ)	S	1730																			89	8	85	6	68	4	95	11	86	6	89	5	70	4	82	13	73	7
Als7/CPAR2_404800	Adhesin Als family	U	R	SGTLGITVSGGTLDCSALHSAITNK	L	2459									39	1									42	20	64	8	59	7	51	5	64	12	55	8	44	2	60	12	48	3
Als7/CPAR2_404800	Adhesin Als family	U	R	SGTLGITVSGGTLDCSALHSAITNK Deamidated (NQ)	L	2460																			52	1													61	3	49	2
Als7/CPAR2_404800	Adhesin Als family	U	R	TPLTPSWIAQLSWK	I	1627																			85	17	62	3	75	14			75	15	71	2	68	4	88	14	71	4
Als7/CPAR2_404800	Adhesin Als family	U	R	TTYTNSYK	C	976																			37	18	30	16	47	11	28	13	42	12	31	21	40	11	41	17	42	20
CPAR2_404780 and CPAR2_404800	Adhesin Als family	F	N-term	AEISNVFQSFDSLTWENGASYR	Y	2520																			83	2
CPAR2_404780 and CPAR2_404801	Adhesin Als family	F	N-term	AEISNVFQSFDSLTWENGASYR 2 Deamidated (NQ)	Y	2522																			66	2			41	1
CPAR2_404780 and CPAR2_404802	Adhesin Als family	F	N-term	AEISNVFQSFDSLTWENGASYR Deamidated (NQ)	Y	2521																			93	6			89	7			99	6
CPAR2_404780 and CPAR2_404803	Adhesin Als family	F	F	DSLTWENGASYR Deamidated (NQ)	Y	1399																			72	2			62	2			67	2			63	1	72	3	78	4
CPAR2_404780 and CPAR2_404804	Adhesin Als family	F	R	FEPGDLVVAYSQLK	C	1565	77	2	63	1					62	3	69	5	76	6	59	1			88	53	81	36	81	38	77	28	78	62	79	39	86	41	89	85	83	44
CPAR2_404780 and CPAR2_404805	Adhesin Als family	F	R	FPFTFNVGGSAGVVDLQNSK	C	2083	53	1							89	2									128	45	124	21	156	34	130	17	135	47	152	23	149	21	145	42	150	23
CPAR2_404780 and CPAR2_404806	Adhesin Als family	F	R	FPFTFNVGGSAGVVDLQNSK Deamidated (NQ)	C	2084																			82	6	62	4	77	4	84	2	73	7	87	3	47	1	115	10	59	2
CPAR2_404780 and CPAR2_404807	Adhesin Als family	F	K	ILGSNVKPGDTFTLN	M	1575																			46	1									53	1			56	5
CPAR2_404780 and CPAR2_404808	Adhesin Als family	F	F	NVGGSAGVVDLQNSK	C	1444																			116	5	101	8	95	3	78	2	115	2	87	3	106	4	104	5	98	3
CPAR2_404780 and CPAR2_404809	Adhesin Als family	F	F	TFNVGGSAGVVDLQNSK	C	1692																			88	1	85	3					84	2	93	1	79	3	86	4	89	2
CPAR2_404780 and CPAR2_404810	Adhesin Als family	F	N	VGGSAGVVDLQNSK	C	1330																			80	6	62	3			83	3	83	1	91	3	88	4	87	6	88	5
CPAR2_404780 and CPAR2_404811	Adhesin Als family	F	K	ILGSNVKPGDTFTLNMPCVFK	F	2337																			66	14	64	13	56	4	68	10	68	18	69	15	39	5	29	4	82	12
CPAR2_404780 and CPAR2_404812	Adhesin Als family	F	K	ILGSNVKPGDTFTLNMPCVFK Oxidation (M)	F	2353																															43	3	37	1	38	3
CPAR2_404780, CPAR2_404800 and CPAR2_404770	Adhesin Als family	F	K	CFTPGTNEVTFTDGDK	K	1788																			82	5	98	8	73	3	89	5	96	7	84	8	103	5	107	12	96	8
CPAR2_404780, CPAR2_404800 and CPAR2_404771	Adhesin Als family	F	K	CFTPGTNEVTFTDGDKK	L	1916	28	1											21	1					82	13	87	23	83	19	86	9	67	16	71	18	91	12	75	17	81	12
CPAR2_404780, CPAR2_404800 and CPAR2_404772	Adhesin Als family	F	K	CTASDNVKDSTDATGTVR	F	1897																			55	4	56	6	36	2	49	2	78	3	51	3			121	18	79	7
CPAR2_404780, CPAR2_404800 and CPAR2_404773	Adhesin Als family	F	K	DSTDATGTVR	F	1021	52	1	47	1					69	10	70	24	76	30			56	1	85	93	58	158	86	37	56	131	72	74	57	117	85	114	73	108	81	161
CPAR2_404780, CPAR2_404800 and CPAR2_404774	Adhesin Als family	F	K	PGDTFTLNMPCVFK	F	1626																			81	2	68	1	71	2			69	1	52	1	73	2	78	6	80	5
CPAR2_404780, CPAR2_404800 and CPAR2_404775	Adhesin Als family	F	N	VKPGDTFTLNMPCVFK	F	1853																					57	1			41	1			48	2			50	2	43	1
CPAR2_404780, CPAR2_404800 and CPAR2_500660	Adhesin Als family	F	R	VVPSLNK	Q	755																			39	12	22	4	31	4	33	7	44	7	30	8	43	17	46	30	49	23
CPAR2_404780, CPAR2_404770 and CPAR2_500660	Adhesin Als family	F	K	QQLYLLGGTCPNGYR	R or S	1739																			29	1	35	4	61	1			71	3	82	5
CPAR2_404780, CPAR2_404770 and CPAR2_500660	Adhesin Als family	F	K	QQLYLLGGTCPNGYR 2 Deamidated (NQ)	R or S	1741													62	2
CPAR2_404780, CPAR2_404770 and CPAR2_500660	Adhesin Als family	F	K	QQLYLLGGTCPNGYR Deamidated (NQ)	R or S	1740													47	2					78	4	98	8	74	4	91	5	87	7	91	11	52	1	91	9	78	5
CPAR2_600430 (Hyr31)	Adhesin Iff/Hyr family	U	K	SVPGIPGVDPDER	A	1337																					36	3							50	4
CPAR2_600430 and CPAR2_806400	Adhesin Iff/Hyr family	F	R	GFGTDKNGVANK Deamidated (NQ)	L	1208																					51	5	41	1	49	9			57	25			47	1
CPAR2_600430 and CPAR2_806400	Adhesin Iff/Hyr family	F	K	LGLTATLSTPTPGK	N	1356																					49	6	44	2	63	11	45	1	65	10			46	3	60	3
CPAR2_600430, CPAR2_806400 and CPAR2_404120	Adhesin Iff/Hyr family	F	K	QLTGMLGSGCVTAQGK	S or A	1607																					69	2	83	2	78	3	36	1	83	7			85	5	81	2
CPAR2_600430, CPAR2_806400 and 2 other Iff/Hyr proteins	Adhesin Iff/Hyr family	F	K	GASGYIFK	I	841																					30	1			28	1			26	1
CPAR2_600430, CPAR2_806400 and 4 other Iff/Hyr proteins	Adhesin Iff/Hyr family	F	K	FQIVSDTSR	G or E	1052													46	5							52	1	44	1	41	2			42	3	41	2	62	4	55	2
CPAR2_600430, CPAR2_806400 and 4 other Iff/Hyr proteins	Adhesin Iff/Hyr family	F	K	SDSYTYLGYDGK	T	1368													55	3							66	3	50	2	69	8			63	8			57	4	73	6
CPAR2_600430, CPAR2_806400 and 5 other Iff/Hyr proteins	Adhesin Iff/Hyr family	F	K	TMVNNGQICFTNQNWK	Q	1954																					62	1							75	1
CPAR2_600430, CPAR2_806400 and 5 other Iff/Hyr proteins	Adhesin Iff/Hyr family	F	K	TMVNNGQICFTNQNWK Deamidated (NQ)	Q	1955																									79	1			69	2
Rbt1/CPAR2_403510	Adhesin Hwp1 family	U	K	AAFVVSGAER	N	1006																			50	1			57	1			60	2	54	2	59	4	70	2	62	2
Rbt1/CPAR2_403510	Adhesin Hwp1 family	U	R	DEVVEGVDGSTTFDK	R	1597																									38	1
Rbt1/CPAR2_403510	Adhesin Hwp1 family	U	R	DGGSVNFK	A	822																															53	4	55	4	55	4
Rbt1/CPAR2_403510	Adhesin Hwp1 family	U	K	HVKPICK	I	881																			21	1			23	2			24	10
Rbt1/CPAR2_403510	Adhesin Hwp1 family	U	F	LLDLLGK	C	771																															45	1	45	3	45	2
Rbt1/CPAR2_403510	Adhesin Hwp1 family	U	K	SASDSVENAFK	W	1154																			69	1	52	2	58	1	63	2	73	1	47	2	65	3	100	3	73	5
Rbt1/CPAR2_403510	Adhesin Hwp1 family	U	K	SCSYGINTQWSFVK	S	1676																					52	1	34	2
Rbt1/CPAR2_403510	Adhesin Hwp1 family	U	K	SEGESQTTAAPTGEAPK	S	1660																											85	7
Rbt1/CPAR2_403510	Adhesin Hwp1 family	U	K	SFDPYALLNK	E	1167																			58	6	61	5	58	4	40	5	54	6	63	7	58	1			49	4
Rbt1/CPAR2_403510	Adhesin Hwp1 family	U	R	TLGFLLDLLGK	C	1189							43	2	80	6	90	4	81	12	74	8	75	5	94	76	68	49	93	114	68	76	107	108	78	96	106	110	107	113	93	41
Rbt1/CPAR2_403510	Adhesin Hwp1 family	U	R	TLGFLLDLLGKCTTK	K	1679													31	2					81	2	60	1	68	3	65	2	68	3	62	2	54	2	34	1	55	5
Ywp1/CPAR2_806670	Adhesin Hwp1 family	U	R	DAQSLADSLESK	D	1263	84	86	77	73	91	72	85	98	83	94	84	22	80	15	78	24	79	21	82	32	70	34	79	28	81	40	88	33	67	38	74	11	80	14	79	9
Ywp1/CPAR2_806670	Adhesin Hwp1 family	U	K	YFTDIVNAGTVISIPAR	L	1836							49	2
CPAR2_302140 (Phr1)	CaZy GH72 Gas/Phr family	U	K	ALNTNCLR	V	961	23	1	27	1			25	1	49	2	47	4	47	5	50	6	49	4			22	1			22	2					49	1	44	2	42	2
CPAR2_302140 (Phr1)	CaZy GH72 Gas/Phr family	U	K	DPLADVEACK	R	1117																	40	1
CPAR2_302140 (Phr1)	CaZy GH72 Gas/Phr family	U	K	DPLADVEACKR	D	1273															50	3	63	1
CPAR2_302140 (Phr1)	CaZy GH72 Gas/Phr family	U	K	DRTEEFEHLPVPIFFSEYGCNEK	R	2842			44	1											52	1
CPAR2_302140 (Phr1)	CaZy GH72 Gas/Phr family	U	R	DVEHFK	A	773			34	1	24	1			27	12	26	5	26	8	32	32	32	32	28	2			24	6											26	5
CPAR2_302140 (Phr1)	CaZy GH72 Gas/Phr family	U	K	FEDTTPPIEIVGNK	F	1559											65	1	55	4	65	5	66	5															45	4	21	1
CPAR2_302140 (Phr1)	CaZy GH72 Gas/Phr family	U	R	IAIADYFACGSVEER	A	1700	93	2	93	2			68	1	120	2	111	7	107	5	114	12	108	8	71	1	89	2	96	1	94	4	48	2	89	1	96	4	83	2	103	5
CPAR2_302140 (Phr1)	CaZy GH72 Gas/Phr family	U	K	IPVGYSSNDDEDTR	I	1567	50	1									92	1	85	4	76	2	93	4															50	1
CPAR2_302140 (Phr1)	CaZy GH72 Gas/Phr family	U	N-term	KFEDTTPPIEIVGNK	F	1687	81	2	72	1					95	2	87	5	81	6	84	5	91	14	68	1	84	2					95	1			78	2	68	4	92	4
CPAR2_302140 (Phr1)	CaZy GH72 Gas/Phr family	U	R	KIPVGYSSNDDEDTR	I	1695									57	1	93	10	89	6	92	18	124	22													88	1	93	6	78	5
CPAR2_302140 (Phr1)	CaZy GH72 Gas/Phr family	U	K	KYIEDSNGMR Deamidated (NQ)	K	1213											50	2	50	1	57	4	52	3																	48	2
CPAR2_302140 (Phr1)	CaZy GH72 Gas/Phr family	U	R	NDPSWDLDHYER	Y	1546			51	1					51	2	63	6	68	6	64	11	69	9	53	1	65	2	60	1	63	3			37	1	55	2	59	4	70	8
CPAR2_302140 (Phr1)	CaZy GH72 Gas/Phr family	U	K	SNTDASPFVK	A	1065	41	1	35	2	39	1	29	1	30	2	48	5	39	4	48	5	42	4	42	1	42	3	39	2	38	2	38	1	32	1			36	3	52	3
CPAR2_302140 (Phr1)	CaZy GH72 Gas/Phr family	U	R	TEEFEHLPVPIFFSEYGCNEK	R	2571			56	2	52	1			54	2	83	5	66	1	91	5	58	4															65	2	69	4
CPAR2_302140 (Phr1)	CaZy GH72 Gas/Phr family	U	P	VGYSSNDDEDTR	I	1357																	71	3
CPAR2_302140 (Phr1)	CaZy GH72 Gas/Phr family	U	K	YIEDSNGMR	K	1084	35	1	35	1					28	2	50	5	42	4	56	5	45	4							50	2
CPAR2_302140 (Phr1)	CaZy GH72 Gas/Phr family	U	K	YIEDSNGMR Deamidated (NQ)	K	1084															64	5	50	2
CPAR2_302140 (Phr1)	CaZy GH72 Gas/Phr family	U	R	YTEVIDK	L	866	21	1	23	1					29	2	46	5	46	6	46	8	48	9													29	2	41	2	44	3
CPAR2_109660 (Phr2)	CaZy GH72 Gas/Phr family	U	N-term	AAEELPTVEIVGNK	F	1469			61	2	52	2	82	7	60	5	66	5	53	5	74	13	59	3			57	1			48	1	60	3			62	1	48	2	45	3
CPAR2_109660 (Phr2)	CaZy GH72 Gas/Phr family	U	R	ADFFGINNYEWCGK	S	1720	78	7	72	6	73	5	70	7	72	11	68	6	79	10	75	24	74	16	75	5	72	7	69	2	73	11	83	8	72	9	46	1	52	2	63	5
CPAR2_109660 (Phr2)	CaZy GH72 Gas/Phr family	U	A	AEELPTVEIVGNK	F	1398	85	3	102	17	98	8	111	19	95	17	105	10	87	13	96	23	100	15	98	7	91	10	88	6	90	14	95	16	90	13	101	11	86	11	110	13
CPAR2_109660 (Phr2)	CaZy GH72 Gas/Phr family	U	K	CVVSDKVDSDDYADMYSYVCAK	I	2589	28	2	45	2			40	2	55	2					39	3	58	3											26	1
CPAR2_109660 (Phr2)	CaZy GH72 Gas/Phr family	U	R	DIPYLAAVNTNVIR	V	1558	84	14	82	17	76	13	90	36	91	24	87	21	76	14	80	22	83	15	79	13	77	13	78	9	73	18	77	19	83	20	83	18	78	13	80	20
CPAR2_109660 (Phr2)	CaZy GH72 Gas/Phr family	U	R	DIPYLAAVNTNVIR Deamidated (NQ)	V	1559			63	2			69	2	54	2			70	3	66	4	83	2	44	1	69	1			40	1	54	2	75	1					67	1
CPAR2_109660 (Phr2)	CaZy GH72 Gas/Phr family	U	K	DLGIPIFFSEYGCNK	V	1759	42	2	46	3	55	1	80	3	57	2	71	4	65	6					50	3	40	1	59	2	37	1	71	2	42	1	64	4	72	5	78	4
CPAR2_109660 (Phr2)	CaZy GH72 Gas/Phr family	U	K	DPLADPETCK	R	1144									52	4			50	2																			49	4	57	3
CPAR2_109660 (Phr2)	CaZy GH72 Gas/Phr family	U	K	DPLADPETCKR	D	1301			29	1					41	5											20	1									22	1	25	2
CPAR2_109660 (Phr2)	CaZy GH72 Gas/Phr family	U	K	DPQWTLDLFQR	Y	1418	73	9	70	13	74	7	77	18	79	18	76	11	79	8	74	17	85	14	77	11	69	11	73	10	76	17	77	13	79	17	73	9	72	8	85	11
CPAR2_109660 (Phr2)	CaZy GH72 Gas/Phr family	U	A	EELPTVEIVGNK	F	1327											43	1			51	2															56	1			62	1
CPAR2_109660 (Phr2)	CaZy GH72 Gas/Phr family	U	K	EVCDCMANSLK	C	1326							47	2	35	5	45	5	62	7					52	2	37	2			36	1	44	3	32	3	48	9	52	6	50	6
CPAR2_109660 (Phr2)	CaZy GH72 Gas/Phr family	U	K	IDCGGISSNGTTGK Deamidated (NQ)	Y	1367			80	2			87	2	68	2	67	3	65	4	84	4	68	5			63	1					68	2			77	2	61	1	73	3
CPAR2_109660 (Phr2)	CaZy GH72 Gas/Phr family	U	R	KDPQWTLDLFQR	Y	1546	77	15	80	24	85	22	82	28	83	33	89	15	98	13	85	16	78	11	75	9	84	9	92	15	70	15	88	16	88	15	78	13	98	12	88	15
CPAR2_109660 (Phr2)	CaZy GH72 Gas/Phr family	U	Y	LAAVNTNVIR	V	1070	42	1					56	1	47	1									46	1	44	1			46	1	47	1	56	2
CPAR2_109660 (Phr2)	CaZy GH72 Gas/Phr family	U	D	PQWTLDLFQR	Y	1303															55	4
CPAR2_109660 (Phr2)	CaZy GH72 Gas/Phr family	U	K	SSFESSGYATATDDYK	D	1728	87	2	120	2	72	1	92	3	113	7	120	6	112	4					102	1	94	2	66	1	71	1	121	2	72	1	107	3			116	4
CPAR2_109660 (Phr2)	CaZy GH72 Gas/Phr family	U	K	SSFESSGYATATDDYKDLGIPIFFSEYGCNK	V	3469							41	1
CPAR2_109660 (Phr2)	CaZy GH72 Gas/Phr family	U	R	TIPVGYSSSDHAAIR	V	1573	83	21	86	19	93	10	87	27	94	26	94	17	93	9					103	18	81	11	80	8	86	11	92	18	82	10	80	12	85	13	89	10
CPAR2_109660 (Phr2)	CaZy GH72 Gas/Phr family	U	R	VALADYFACGDEDER	A	1730	95	2	100	4	101	1	96	3	82	2	122	6	126	9					68	3	64	2	81	2			91	3	96	1	100	4	107	6	100	6
CPAR2_109660 (Phr2)	CaZy GH72 Gas/Phr family	U	R	VALADYFACGDEDERADFFGINNYEWCGK	S	3431	51	2			53	1	40	1
CPAR2_109660 (Phr2)	CaZy GH72 Gas/Phr family	U	R	VALADYFACGDEDERADFFGINNYEWCGK Deamidated (NQ)	S	3432													65	1
CPAR2_109660 (Phr2)	CaZy GH72 Gas/Phr family	U	K	VDSDDYADMYSYVCAK	I	1901	85	2	86	2			85	2	104	2					98	2															97	2	68	3	50	1
CPAR2_109660 (Phr2)	CaZy GH72 Gas/Phr family	U	K	VSTLEDYNNYK	S	1345															47	2					28	1					28	1
CPAR2_109660 (Phr2)	CaZy GH72 Gas/Phr family	U	K	YGAYSPCSAK	D	1102	48	17	48	25	62	19	55	25	53	24	55	26	65	24	63	34	68	17	52	15	51	18	59	10	50	24	57	21	47	25	62	17	69	24	57	19
CPAR2_100110 (Pga4)	CaZy GH72 Gas/Phr family	U	N	CGDDEMAR	I	952											58	3			71	2	66	4
CPAR2_100110 (Pga4)	CaZy GH72 Gas/Phr family	U	R	DIPYFQELGIN	T	1308													57	1	56	1															62	1	74	2	51	3
CPAR2_100110 (Pga4)	CaZy GH72 Gas/Phr family	U	R	DIPYFQELGINTIR	V	1678	82	5	82	5	79	7	73	10			83	13	89	11	98	14	76	11													97	19	94	15	92	13
CPAR2_100110 (Pga4)	CaZy GH72 Gas/Phr family	U	K	DLTGGNNCPSK	S	1162	60	24	62	29	67	13	61	26	60	36	76	36	64	31	73	40	76	31	61	87	61	68	64	33	70	42	61	30	58	46	71	36	73	38	62	40
CPAR2_100110 (Pga4)	CaZy GH72 Gas/Phr family	U	K	DLTGGNNCPSK Deamidated (NQ)	S	1163	61	7	56	7	54	1	64	10	61	17	68	17	60	13	65	18	63	16	64	21	61	26	58	4	61	32	61	17	64	30	58	21	60	17	65	18
CPAR2_100110 (Pga4)	CaZy GH72 Gas/Phr family	U	R	GVDYQPGGSSELEDPLADTK	V	2077	99	6	88	9	96	6	79	6	78	6	97	12	96	10	94	9	100	9	78	10	72	5	91	8	77	8	89	10	85	7	84	8	91	7	105	8
CPAR2_100110 (Pga4)	CaZy GH72 Gas/Phr family	U	N-term	IPAIEVQGNAFWNTETGK	R	1974			121	2	113	6	65	2	102	2			100	2			59	1	122	3	115	1	85	1	113	3	103	2	107	1			115	4
CPAR2_100110 (Pga4)	CaZy GH72 Gas/Phr family	U	N-term	IPAIEVQGNAFWNTETGK Deamidated (NQ)	R	1975																							43	1			52	1
CPAR2_100110 (Pga4)	CaZy GH72 Gas/Phr family	U	N-term	IPAIEVQGNAFWNTETGKR	F	2130											56	1	67	3					45	1											76	4	57	1	75	4
CPAR2_100110 (Pga4)	CaZy GH72 Gas/Phr family	U	N-term	IPAIEVQGNAFWNTETGKR Deamidated (NQ)	F	2131											51	1																					77	1
CPAR2_100110 (Pga4)	CaZy GH72 Gas/Phr family	U	K	LAEAGIYVILDVNTPHSSITR	S	2268	100	6	84	2	100	7	59	7	45	3	110	11	112	9	121	12	107	9	124	7	134	8	106	13	130	18	66	4	106	4	142	10	102	6	118	12
CPAR2_100110 (Pga4)	CaZy GH72 Gas/Phr family	U	K	LAEAGIYVILDVNTPHSSITR Deamidated (NQ)	S	2269	47	1							86	1	102	2	46	1													86	1	97	1	80	1
CPAR2_100110 (Pga4)	CaZy GH72 Gas/Phr family	U	R	LASGLYFNCGDDEMAR	I	1818	85	3	86	8	89	6	101	8	74	6	92	6	80	6	90	5	79	7	84	4	80	5	84	5	81	5	83	9	92	6	92	8	90	7	94	9
CPAR2_100110 (Pga4)	CaZy GH72 Gas/Phr family	U	R	LASGLYFNCGDDEMAR Oxidation (M)	I	1834			57	1	50	1	86	2	25	1	88	3	79	4					52	2											69	3	87	2	88	3
CPAR2_100110 (Pga4)	CaZy GH72 Gas/Phr family	U	K	LGDDDDDDDVTPNQDFK	N	1923	85	7	88	8	88	8	85	8	85	8	92	10	97	9	88	8	95	6	93	8	89	5	78	7	96	5	92	6	72	4	90	10	104	9	80	8
CPAR2_100110 (Pga4)	CaZy GH72 Gas/Phr family	U	Y	SAASVDEYR	L	996									55	3	59	5	59	7	57	3	61	5	50	7	57	6	45	1	46	1	55	3	55	5	68	8	72	12	75	4
CPAR2_100110 (Pga4)	CaZy GH72 Gas/Phr family	U	R	TIPVGYSAASVDEYR	L	1627	105	10	102	9	103	11	98	12	97	9	118	14	102	14	106	15	95	12	102	12	108	9	100	12	106	13	101	17	110	13	91	11	102	12	103	11
CPAR2_100110 (Pga4)	CaZy GH72 Gas/Phr family	U	F	TVPLFFSEFGCNAK	K	1616	49	2	60	3			50	1	55	1					49	2			65	4	93	5	76	1	69	3	55	1	69	1	48	2	50	1
CPAR2_100110 (Pga4)	CaZy GH72 Gas/Phr family	U	Y	VILDVNTPHSSITR	S	1551																									43	2
CPAR2_100110 (Pga4)	CaZy GH72 Gas/Phr family	U	R	VYSVDNTK	D	924	38	16	46	5	49	8	41	11	37	13	54	18	46	12	43	9	43	4	43	42	42	22	49	10	37	23	42	13	42	25	41	15	46	16	48	19
CPAR2_100110 (Pga4)	CaZy GH72 Gas/Phr family	U	R	VYSVDNTKDHDECMDK	L	1955	45	5	56	3	37	10	46	5	23	3	43	10	38	13	52	19	47	18	57	8	61	12	40	7	77	12	37	7	38	11	47	20	64	22	50	19
CPAR2_407410 (MP65)	CaZy GH17 Bgl2 family	U	K	ADGPYNAEK	Y	963	76	17	73	20	79	8	81	24	73	25	81	65	78	30	81	40	78	27	75	7	52	18	71	7	46	26	75	23	42	18	81	47	76	22	78	38
CPAR2_407410 (MP65)	CaZy GH17 Bgl2 family	U	K	AHGSWDDIHTVSVGNELVNSGQANPSQIK	S	3059	67	1	62	5	22	1	44	1	53	2	68	4	50	1							36	1					29	1					63	1	49	1
CPAR2_407410 (MP65)	CaZy GH17 Bgl2 family	U	K	AHGSWDDIHTVSVGNELVNSGQANPSQIK Deamidated (NQ)	S	3060															65	2																	71	1	63	1
CPAR2_407410 (MP65)	CaZy GH17 Bgl2 family	U	S	AISDGVQTIADAVK	A	1387											82	5	70	1																					81	4
CPAR2_407410 (MP65)	CaZy GH17 Bgl2 family	U	K	AVPSKENQEAAIQSIK	D	1712	68	2	68	2							68	7																			38	2
CPAR2_407410 (MP65)	CaZy GH17 Bgl2 family	U	K	DTCGSASILFTAFNDLWK	A	2045	109	6	102	7	104	5	94	5	94	4	106	4							97	2			80	3			93	5
CPAR2_407410 (MP65)	CaZy GH17 Bgl2 family	U	K	ENQEAAIQSIK	D	1230	71	13	74	14	80	7	74	8	69	2	67	9							68	12	78	9	74	7	67	5	61	4	55	3	52	10	61	5	56	7
CPAR2_407410 (MP65)	CaZy GH17 Bgl2 family	U	K	GVTYTPYADNGNCK	T	1559	47	3	53	4			44	1	45	2	58	3	27	1			39	2	48	2	21	1			39	2	33	2	31	2	59	5	35	2	55	4
CPAR2_407410 (MP65)	CaZy GH17 Bgl2 family	U	K	GVTYTPYADNGNCK Deamidated (NQ)	T	1560	54	5	59	6	70	4	60	7	42	1	58	8	44	1					45	3			48	1	43	1	63	2			73	4	52	4	49	2
CPAR2_407410 (MP65)	CaZy GH17 Bgl2 family	U	K	IFAGIYDVSAISDGVQTIADAVK	A	2352	106	3	92	7	74	5	83	5	79	5
CPAR2_407410 (MP65)	CaZy GH17 Bgl2 family	U	R	LYGVDCDQVAQVLQAK	A	1806	115	14	106	12	102	7	99	8	107	6	104	12	96	6			71	2	98	8			98	2			85	1			105	12	91	9	119	10
CPAR2_407410 (MP65)	CaZy GH17 Bgl2 family	U	K	NVLITETGWPSR	G	1372	73	4	85	9	66	2	68	7	71	5	77	8	88	9	77	13	68	9	59	5	40	1	65	3	26	1	56	4	57	4	63	4	72	4	83	6
CPAR2_407410 (MP65)	CaZy GH17 Bgl2 family	U	N	SGQANPSQIK	S	1029											57	3	47	1			42	2													60	4	43	2	42	1
CPAR2_407410 (MP65)	CaZy GH17 Bgl2 family	U	K	SYVNQAK	S	808	21	1	31	2			24	1	37	1	36	4	39	2											25	1
CPAR2_407410 (MP65)	CaZy GH17 Bgl2 family	U	K	TSSQIASEVAELSGFDVIR	L	2008	91	6	96	8	96	6	110	9	84	6	102	8	37	3	40	5	49	1	57	2			94	4			91	4			80	5	99	6	102	6
CPAR2_407410 (MP65)	CaZy GH17 Bgl2 family	U	K	TSSQIASEVAELSGFDVIR Deamidated (NQ)	L	2009							62	1											63	1
CPAR2_401600 (Bgl2)	CaZy GH17 Bgl2 family	U	R	EDLTADQLSEK	I	1248			33	2			25	1	37	1									47	1			40	1	47	2			30	1
CPAR2_401600 (Bgl2)	CaZy GH17 Bgl2 family	U	K	HWGVWDANYK	L	1275	52	3	47	2	52	1	57	3	49	2	61	5	62	4	42	2	50	5	39	3			35	2	28	1	21	1	32	1	31	3	45	4	52	8
CPAR2_401600 (Bgl2)	CaZy GH17 Bgl2 family	U	K	IFLVGSEALYR	E	1267	55	1	68	1			66	1	62	1	65	4	58	9	65	5	71	8	59	1	52	1	59	1	79	2	55	1	47	1	84	4	63	3	57	3
CPAR2_401600 (Bgl2)	CaZy GH17 Bgl2 family	U	K	IFLVGSEALYREDLTADQLSEK	I	2496			29	2					23	1
CPAR2_401600 (Bgl2)	CaZy GH17 Bgl2 family	U	N-term	IGDLAFNLGVK	D	1146									47	1	74	4	66	5	75	2	69	4			58	1					47	1	44	1	78	5	67	3	57	2
CPAR2_401600 (Bgl2)	CaZy GH17 Bgl2 family	U	K	INEIKDLVK	N	1071													50	4	32	1	34	2																	53	1
CPAR2_401600 (Bgl2)	CaZy GH17 Bgl2 family	U	K	NFWQNAICAMR	G	1410	73	6	49	1	45	1	72	3	59	2	54	2	71	7	47	2	55	3			50	1			51	2	78	1	44	1	49	2	58	5	56	4
CPAR2_401600 (Bgl2)	CaZy GH17 Bgl2 family	U	K	QALQQYLTQISTSTIK	I	1822							61	1	58	1	76	4	89	6	107	2	94	5															68	1	70	3
CPAR2_401600 (Bgl2)	CaZy GH17 Bgl2 family	U	K	QALQQYLTQISTSTIK Deamidated (NQ)	I	1823													57	1
CPAR2_401600 (Bgl2)	CaZy GH17 Bgl2 family	U	K	TVDEFKSDLEVIK	G	1522	66	2	70	2	48	1	65	3	57	2	68	4	62	2	52	2	62	2	55	1			48	2	35	1	42	2			45	2	52	4	72	5
CPAR2_400860 (Crh11)	CaZy GH16 Crh family	U	N-term	ATSTASCNPIK	S	1149	69	25	77	29	75	19	89	55	75	46	77	43	76	49	68	12	67	28	75	68	74	39	78	22	69	48	75	37	64	22	74	18	69	31	89	37
CPAR2_400860 (Crh11)	CaZy GH16 Crh family	U	K	DGEVNGRYSDAQSDVNK Deamidated (NQ)	A	1854	67	1	72	1			57	1
CPAR2_400860 (Crh11)	CaZy GH16 Crh family	U	K	DSLDWIVDGSVIR	S	1474	101	42	99	39	101	42	101	51	99	57	100	40	101	45	97	28	98	37	108	21	82	19	104	29	89	25	89	25	84	18	101	21	100	27	105	27
CPAR2_400860 (Crh11)	CaZy GH16 Crh family	U	Y	FTNSGNQGDVK	T	1166													45	1					42	1													63	5
CPAR2_400860 (Crh11)	CaZy GH16 Crh family	U	R	GGYHSINPSPLTNYHK	Y	1784	69	23	59	13	59	7	53	18	64	17	65	15	63	14	76	12	77	14	73	13	59	20	61	8	66	18	69	11	66	11	68	16	64	13	57	14
CPAR2_400860 (Crh11)	CaZy GH16 Crh family	U	R	SLHITNSQGYPQSPMR	I	1815	89	25	93	26	86	19	86	27	87	20	96	22	80	17	93	16	98	20	100	17	103	17	73	4	40	1	90	12	111	11	88	10	95	17	89	11
CPAR2_400860 (Crh11)	CaZy GH16 Crh family	U	R	SLHITNSQGYPQSPMR Deamidated (NQ)	I	1816	52	1	48	1			70	1	68	1	70	1	59	2	70	1	41	1	49	1	72	2			71	3	68	2	71	3			54	1	69	1
CPAR2_400860 (Crh11)	CaZy GH16 Crh family	U	R	SLHITNSQGYPQSPMR Oxidation (M)	I	1831	74	3	84	1							87	3	89	3
CPAR2_400860 (Crh11)	CaZy GH16 Crh family	U	K	TGDEGLSLTVNK	R	1233	89	16	102	16	97	17	85	21	75	17	88	14	92	12	94	9	88	10	75	11	58	10	93	6	88	15	85	16	61	13	92	8	92	12	84	7
CPAR2_400860 (Crh11)	CaZy GH16 Crh family	U	K	TGDEGLSLTVNKR	F	1389	81	14	79	12	57	7	62	11	61	8	73	21	86	23			28	4	67	5	76	6	57	6	78	3	75	8	66	2	71	9	69	10	66	13
CPAR2_400860 (Crh11)	CaZy GH16 Crh family	U	R	YSDAQSDVNK	A	1125	69	65	72	57	72	16	72	78	72	63	71	108	77	137	59	4	49	4	71	48	63	95	67	20	66	128	72	42	58	76	76	81	71	100	76	97
CPAR2_503190 (Utr2)	CaZy GH16 Crh family	U	R	HDFPQTPSR	I	1084	65	12	68	23	68	10	63	20	68	21	66	16	56	21	65	29	60	34	71	23	49	19	68	12	56	38	58	9	49	23	62	17	51	13	68	24
CPAR2_503190 (Utr2)	CaZy GH16 Crh family	U	K	RHDFPQTPSR	I	1240	38	6	31	2	28	2			28	6			36	5	46	43	44	27	41	3	29	10	35	2	45	11	25	1	24	4	33	7	48	15	43	13
CPAR2_503190 (Utr2)	CaZy GH16 Crh family	U	K	TWLGNDDATGFDPDNDR	D	1908															63	2
CPAR2_503190 (Utr2)	CaZy GH16 Crh family	U	K	YGYFYAHIK	E	1161	34	5	39	6	27	3	41	10	44	8	49	8	54	6	44	5	44	6	41	7	41	9	33	3	50	12	41	8	40	9	49	7	50	4	49	7
CPAR2_503190 (Utr2)	CaZy GH16 Crh family	U	K	YLWYGK	V	828	29	1			27	1	21	1	21	1	30	5	27	3	29	3	29	6	21	1											27	1	27	4	27	3
CPAR2_502140 (Cht2)	CaZy GH18 Chitinase	U	N-term	ASNSVAVYWGQNGAGGQDR	L	1936	84	3	109	9							107	4	81	4			82	6	97	4	92	4	85	4	71	5	100	4	98	5	84	5	89	7	98	7
CPAR2_502140 (Cht2)	CaZy GH18 Chitinase	U	N-term	ASNSVAVYWGQNGAGGQDR 2 Deamidated (NQ)	L	1938			66	3			80	4							66	1							63	2	74	4	42	1	74	1			89	4
CPAR2_502140 (Cht2)	CaZy GH18 Chitinase	U	N-term	ASNSVAVYWGQNGAGGQDR Deamidated (NQ)	L	1937	86	4	77	15	95	18	89	12	79	4	87	11	69	6	90	6	80	5	99	16	95	6	86	15	79	9	79	24	103	8	92	10	96	11	92	5
CPAR2_502140 (Cht2)	CaZy GH18 Chitinase	U	H	CSAIGEDIK	T	992	56	4	45	1			41	1	56	1	75	4	55	4	54	3	64	5			53	1	50	1	50	2	56	1	45	1	61	4	68	4	66	4
CPAR2_502140 (Cht2)	CaZy GH18 Chitinase	U	Q	CVYPDAHVGPLLEK	V	1597	76	3	82	6	46	1	68	2	61	4	80	9	70	9	94	11	82	9	67	6	53	4					54	3	59	3	76	8	76	8	80	14
CPAR2_502140 (Cht2)	CaZy GH18 Chitinase	U	K	FASSSPNPDLK	L	1162	77	68	64	57	73	46	72	29	66	30	70	20	71	13	64	17	77	17	75	50	66	28	74	51	67	25	69	50	56	26	81	21	69	28	62	18
CPAR2_502140 (Cht2)	CaZy GH18 Chitinase	U	S	GLLHCSAIGEDIK	T	1412	59	2	83	4	65	5	53	1	60	2									71	7			68	8			80	7
CPAR2_502140 (Cht2)	CaZy GH18 Chitinase	U	L	HCSAIGEDIK	T	1129			50	3					59	2									62	4
CPAR2_502140 (Cht2)	CaZy GH18 Chitinase	U	K	HFAGVSLWDASGAWLNTDASGANFADQVK	K	3034	79	19	60	15	55	18	62	13	63	20	90	9	57	2	71	6	34	2	78	28	58	2	65	31	42	1	75	29	22	1	83	8	94	4	99	5
CPAR2_502140 (Cht2)	CaZy GH18 Chitinase	U	K	HFAGVSLWDASGAWLNTDASGANFADQVK Deamidated (NQ)	K	3035	62	3	48	1			44	2			81	1			85	2	47	1	74	2			59	9	95	1	56	4			87	3	76	2	65	3
CPAR2_502140 (Cht2)	CaZy GH18 Chitinase	U	K	HFAGVSLWDASGAWLNTDASGANFADQVKK	V	3163	97	52	89	20	63	23	55	7	63	16	102	7	71	2	95	3	93	6	50	16	95	4	95	27	95	6	82	30	66	1					30	1
CPAR2_502140 (Cht2)	CaZy GH18 Chitinase	U	K	HFAGVSLWDASGAWLNTDASGANFADQVKK Deamidated (NQ)	V	3164	77	8	87	7	81	1							98	4	92	3	43	1	45	1			46	1	84	1	58	3	49	1	107	6			49	2
CPAR2_502140 (Cht2)	CaZy GH18 Chitinase	U	K	KVLLSLGGAAGNYGFK	T	1594	117	28	136	25	136	18	123	9	118	19	120	16	119	7	112	10	121	10	130	14	125	15	121	11	131	15	137	19	116	15	133	16	120	13	125	14
CPAR2_502140 (Cht2)	CaZy GH18 Chitinase	U	K	KYYLSASPQ	C	1056	48	3	51	2	47	1					81	4			45	2			62	1			57	1	44	1	48	1			62	5			68	4
CPAR2_502140 (Cht2)	CaZy GH18 Chitinase	U	K	KYYLSASPQCVYPDAHVGPLLEK	V	2634	76	27	76	18	78	13	94	7	99	14	88	12	86	4	89	9	80	9	41	8	111	2	61	13	85	7	71	12	93	8	83	6	81	7	78	8
CPAR2_502140 (Cht2)	CaZy GH18 Chitinase	U	K	KYYLSASPQCVYPDAHVGPLLEK Deamidated (NQ)	V	2635	64	1					51	1							74	3			47	1	77	3			69	3			48	1	82	6	49	1	53	2
CPAR2_502140 (Cht2)	CaZy GH18 Chitinase	U	K	LYVGVPSTGNVAGYVDAATLAK	S	2165	122	63	105	50	103	37	103	29	106	44	104	25	124	12	117	12	100	14	104	36	91	19	95	46	107	33	101	62	100	23	118	27	109	21	112	19
CPAR2_502140 (Cht2)	CaZy GH18 Chitinase	U	K	LYVGVPSTGNVAGYVDAATLAK Deamidated (NQ)	S	2166			41	1							41	1	44	1	51	1															58	1
CPAR2_502140 (Cht2)	CaZy GH18 Chitinase	U	G	NVAGYVDAATLAK	S	1292	66	1	54	1							54	4																			44	2			59	1
CPAR2_502140 (Cht2)	CaZy GH18 Chitinase	U	L	SASPQCVYPDAHVGPLLEK	V	2067			64	4	70	3	70	2	66	4	42	2							70	3			68	5			64	4			44	1	56	1	47	2
CPAR2_502140 (Cht2)	CaZy GH18 Chitinase	U	K	SIDEIK	C	703	39	48	38	40	40	40	37	35	39	44	41	63	38	41	41	46	36	51	39	46	25	14	38	38	26	17	42	36	25	7	39	58	38	56	41	62
CPAR2_502140 (Cht2)	CaZy GH18 Chitinase	U	K	SIDEIKCDK	H	1107	40	54	44	37	43	18	53	25	44	25	43	18	42	17	38	14	36	15	47	51	38	36	47	26	36	35	54	38	39	41	42	16	40	17	42	18
CPAR2_502140 (Cht2)	CaZy GH18 Chitinase	U	L	SLGGAAGNYGFK	T	1141	63	3	56	2							41	2			61	1			65	4	83	3	75	3	83	7			68	7	63	3
CPAR2_502140 (Cht2)	CaZy GH18 Chitinase	U	N	SVAVYWGQNGAGGQDR Deamidated (NQ)	L	1665	91	4	69	1			78	1	78	1	102	5	94	4	94	2	101	5	98	2	81	2					80	3	70	1	84	4	89	4	97	6
CPAR2_502140 (Cht2)	CaZy GH18 Chitinase	U	C	SVDGQFNYDTWSK	F	1546	61	3	78	4	78	2	51	3	65	3					90	6	94	8	74	5	71	3	77	3	85	5	91	5	53	3	76	8	72	6	75	7
CPAR2_502140 (Cht2)	CaZy GH18 Chitinase	U	S	TGNVAGYVDAATLAK	S	1450	69	1	59	1	65	1	63	1			64	1					53	1									62	1			75	6	68	3	69	3
CPAR2_502140 (Cht2)	CaZy GH18 Chitinase	U	K	TTDDAVAYADTLWNK	F	1683	110	76	90	67	107	47	92	50	94	57	110	24	87	16	91	31	86	27	101	49	81	20	96	56	94	34	94	61	89	31	91	29	92	35	90	28
CPAR2_502140 (Cht2)	CaZy GH18 Chitinase	U	H	VGPLLEK	V	754			59	2	53	1					46	3	63	2	56	4	63	4	50	5			59	4							58	4	60	6	61	5
CPAR2_502140 (Cht2)	CaZy GH18 Chitinase	U	K	VLLSLGGAAGNYGFK	T	1466	110	101	113	88	127	76	129	68	124	84	118	50	123	29	123	53	144	42	113	67	114	39	115	89	119	44	124	95	109	34	114	53	134	63	124	43
CPAR2_502140 (Cht2)	CaZy GH18 Chitinase	U	K	VPLDFAFIQFYNNPCSVDGQFNYDTWSK	F	3372	42	2			37	1	41	1	47	2													29	1			33	1
CPAR2_502140 (Cht2)	CaZy GH18 Chitinase	U	K	VPLDFAFIQFYNNPCSVDGQFNYDTWSK Deamidated (NQ)	F	3373			65	2
CPAR2_502140 (Cht2)	CaZy GH18 Chitinase	U	Y	WGQNGAGGQDR Deamidated (NQ)	L	1146			62	1	40	1					74	7	53	4	61	5	73	6					43	1					41	1					68	2
CPAR2_502140 (Cht2)	CaZy GH18 Chitinase	U	F	YNNPCSVDGQFNYDTWSK	F	2194			86	1	91	2			114	2									90	1			76	1			103	2
CPAR2_502140 (Cht2)	CaZy GH18 Chitinase	U	K	YYLSASPQCVYPDAH	V	1770	65	3	54	3	64	3	60	5	64	4	55	1	68	6	59	4	59	7	71	3	51	2	70	4	70	2	73	5	60	2	56	2	54	4	73	7
CPAR2_502140 (Cht2)	CaZy GH18 Chitinase	U	K	YYLSASPQCVYPDAHVGPLLEK	V	2506	72	17	81	12	53	17	71	18	87	20	57	8	47	4	62	15	57	9	80	22	79	19	73	28	88	28	77	27	103	14	70	12	59	11	62	6
CPAR2_502140 (Cht2)	CaZy GH18 Chitinase	U	K	YYLSASPQCVYPDAHVGPLLEK Deamidated (NQ)	V	2507	88	3	95	3					65	1			46	1					79	3	70	1			73	2	65	1					41	1
CPAR2_502130 (Cht21)	CaZy GH18 Chitinase	U	R	GINYDSWSQFADTAPNPNMK	L	2255																					68	1			87	2									63	1
CPAR2_502130 (Cht21)	CaZy GH18 Chitinase	U	K	KVLLSIGAPGSR	S	1197																					61	2	61	1	62	2									50	1
CPAR2_502130 (Cht21)	CaZy GH18 Chitinase	U	R	NLPPIIDR	V	937																									22	3									32	2
CPAR2_502130 (Cht21)	CaZy GH18 Chitinase	U	R	SQFANPQQAEALADTLWNK	F	2131																							88	4	55	5
CPAR2_502130 (Cht21)	CaZy GH18 Chitinase	U	R	SQFANPQQAEALADTLWNK Deamidated (NQ)	F	2132																									73	2
CPAR2_502130 (Cht21)	CaZy GH18 Chitinase	U	R	TTGYMTCPNFAEDIK	S	1747																					50	3	24	1											63	4
CPAR2_502130 (Cht21)	CaZy GH18 Chitinase	U	K	VLLSIGAPGSR	S	1069																			48	1	54	6	61	5	57	8					35	1			61	3
CPAR2_502130 (Cht21)	CaZy GH18 Chitinase	U	R	VNCDPHFAGVALWDASGAFLR	E	2302																									52	1					66	2	62	2	70	2
CPAR2_502130 (Cht21)	CaZy GH18 Chitinase	U	R	VNCDPHFAGVALWDASGAFLR Deamidated (NQ)	E	2303																															45	1	60	2	51	1
CPAR2_502130 (Cht21)	CaZy GH18 Chitinase	U	R	YIDNVKR	V	907																					29	8			30	16					36	2			41	6
CPAR2_502120 (Cht22)	CaZy GH18 Chitinase	U	K	DIVGDWLINK	N	1172																					44	2			53	2									56	2
CPAR2_502120 (Cht22)	CaZy GH18 Chitinase	U	K	FADSAPNPNMK	S	1191																									43	1
CPAR2_502140 and CPAR2_502130	CaZy GH18 Chitinase	F	K or R	SKFDSSK	K	797	36	9			35	11
CPAR2_213080 (Sod4)	Superoxide dismutase	U	N-term	GDTPIQSDSADQPSLQAK	F	1857	79	1	65	2			83	3	69	1							81	4	66	1	87	2			71	5	69	1	101	6
CPAR2_213080 (Sod4)	Superoxide dismutase	U	K	IQGTSLSTEYVDNYISLNPDSK	T	2443																	59	1
CPAR2_213080 (Sod4)	Superoxide dismutase	U	K	IQGTSLSTEYVDNYISLNPDSK Deamidated (NQ)	T	2444																	61	1
CPAR2_213080 (Sod4)	Superoxide dismutase	U	K	VDVEGLPSSGGPFPYHIHER	P	2192																	47	2
CPAR2_102610 (Sap9)	Aspartic protease	U	K	VPVSDLVLQASR	S	1283			81	2			74	1	84	2			47	2	82	4	79	4			38	2							51	2	44	2	34	1	46	3
CPAR2_102610 (Sap9)	Aspartic protease	U	K	YEGTLETVPMLK	T	1380															49	3	27	2			37	1					51	1
CPAR2_102610 (Sap9)	Aspartic protease	U	R	YSSSAGAYIVDCR	F	1448	49	1													84	2					51	1			32	1	28	1	46	1
CPAR2_702730 (Sap91)	Aspartic protease	U	R	DGTLSDFSVELK	Q	1310									51	2	89	6	70	4	90	18	83	16	72	8	66	14			66	11	61	3	66	12	83	10	75	7	77	11
CPAR2_702730 (Sap91)	Aspartic protease	U	K	ENLETIPIVEGR	D	1369											29	2	44	4	65	17	65	11	33	1	54	3	39	1	56	4	41	1	38	2			53	7	51	4
CPAR2_702730 (Sap91)	Aspartic protease	U	R	GLEATSQLGYVYDNLPYK	M	2030											84	4	89	5	108	16	100	11	94	9	101	8	87	1	111	12	108	4	97	14	89	7	102	10	107	8
CPAR2_702730 (Sap91)	Aspartic protease	U	K	IINVPVSK	L	869															47	10	51	7	41	3	43	12	29	1	42	7	37	2	37	8			49	2
CPAR2_702730 (Sap91)	Aspartic protease	U	K	MKADGVINK	V	975															62	18	57	15	50	4	57	19			53	12	54	6	53	14			54	5
CPAR2_702730 (Sap91)	Aspartic protease	U	K	QISLSR	D	702													26	1	38	7	32	12															28	1
CPAR2_702730 (Sap91)	Aspartic protease	U	H	QLEAVGQAFDGELSDGK	Y	1763															115	4	92	5
CPAR2_702730 (Sap91)	Aspartic protease	U	K	SGSVLFGAIDHAK	Y	1301							20	1	52	2	63	6	54	8	70	17	72	19	59	10	66	16	48	1	59	11	54	6	64	12	48	4	51	5	63	5
CPAR2_702730 (Sap91)	Aspartic protease	U	R	TSNVMGVLGIGLR	G	1316							77	3	67	2	85	5	88	4	95	23	87	17	90	19	79	19	62	2	87	23	93	10	86	22	87	8	106	6	83	3
CPAR2_702730 (Sap91)	Aspartic protease	U	R	TSNVMGVLGIGLR Oxidation (M)	G	1332											53	2	56	3	53	3	71	4	52	2	62	7			41	1			45	2	23	1	55	2	70	4
CPAR2_702730 (Sap91)	Aspartic protease	U	K	TYALFGDNILR	S	1282							38	2	35	1	65	5	59	7	83	23	81	33	73	14	69	25	51	2	68	21	63	8	64	25	64	4	73	6	69	6
CPAR2_702730 (Sap91)	Aspartic protease	U	K	VLYSLYLNEADAK	S	1498											83	5	79	5	85	18	93	20	73	15	77	15	71	3	83	17	75	8	76	18	86	7	90	8	88	8
CPAR2_702730 (Sap91)	Aspartic protease	U	K	YKENLETIPIVEGR	D	1660							41	1	66	2	93	11	71	5	105	18	96	21	85	9	92	12	89	1	83	9	92	3	82	10	79	9	95	13	96	14
CPAR2_702720 (Sap92)	Aspartic protease	U	R	DGTFSDLAVELK	H	1294											81	5	68	3	71	4	76	4	61	1	55	3
CPAR2_702720 (Sap92)	Aspartic protease	U	R	GLESTSSFGYFYDSLPYK	M	2060											39	1	25	1
CPAR2_702720 (Sap92)	Aspartic protease	U	K	HEGHLETLPVVK	G	1358																			62	7	50	6
CPAR2_702720 (Sap92)	Aspartic protease	U	K	SLGEALDGEFIESQGAFK	V	1897											113	3	116	5	78	2	117	2	109	1	114	4
CPAR2_702720 (Sap92)	Aspartic protease	U	K	VLYSLYLNDINASTGSVLFGAIDHAK	H	2781																			22	1
CPAR2_500920 (Sap10)	Aspartic protease	U	K	GTILFGGVDNNK	Y	1234																					40	1
CPAR2_500920 (Sap10)	Aspartic protease	U	R	YDNFISLLK	K	1112													61	3	40	1	47	2
CPAR2_702730 and CPAR2_702720	Aspartic protease	F	R	SAYIVYDLEDLQVQIAQAR	Y	2194															79	7	93	7	65	3	66	1
CPAR2_702730 and CPAR2_702720	Aspartic protease	F	R	YTDEEDIR	V	1040							30	1	27	1	57	18	62	12	64	20	64	24	57	11	45	18			45	10	37	4	45	17	55	4	64	18	67	11
CPAR2_804680 (Plb5)	Phospholipase	U	R	AMLCGAGQLLATDDR	F	1591															64	1
CPAR2_804680 (Plb5)	Phospholipase	U	R	DANDISDLEK	N	1119	40	1	33	1	46	2	63	2	58	2	64	4	37	1	70	4	44	4	48	2	38	1	42	2	40	2	46	2	39	2	56	3	43	2	62	4
CPAR2_804680 (Plb5)	Phospholipase	U	K	EEAGFDTTITDIWGR	A	1710	62	2	64	1	65	2	57	6	77	4	79	6	55	4	76	7	82	6	54	1			79	2	42	1	77	3	67	2	75	4	56	3	65	5
CPAR2_804680 (Plb5)	Phospholipase	U	R	FGQEQSDECK	Q	1227	59	5	67	11	66	3	75	15	70	21	65	9	65	14	63	14	67	15	59	7	57	7	55	3	67	14	74	13	68	15	63	12	67	13	68	10
CPAR2_804680 (Plb5)	Phospholipase	U	K	LSYENAEK	Y	953	30	1	28	3	41	3	50	6	29	2	49	6	52	7	53	11	47	8	22	1	21	1	33	1	27	4	50	2	30	3	53	8	45	4	38	3
CPAR2_804680 (Plb5)	Phospholipase	U	R	NGFEVMSR Deamidated (NQ)	N	939															61	2
CPAR2_804680 (Plb5)	Phospholipase	U	K	NLIDFLQK	K	990			34	1	23	1	46	4	45	4			37	2	31	4			25	2	21	1	36	2	41	1	39	2	33	2	49	3			43	2
CPAR2_804680 (Plb5)	Phospholipase	U	K	SILTGLLSR	L	959	47	1	47	2			49	2	48	4	61	3	70	5	84	5	67	5	56	2	42	1			43	2	47	1	53	2	66	4	59	3	63	4
CPAR2_804680 (Plb5)	Phospholipase	U	K	TIAYYYGLR	E	1119					28	1	41	2	45	5	30	1	23	1	47	5	36	1															29	1
CPAR2_808920 (Plb51)	Phospholipase	U	R	AMLAGAGSILALDNR	F	1472							54	2			96	7	70	2	76	3	95	4	65	3	65	4	75	2	77	4	54	1	83	3	69	1	30	2	87	4
CPAR2_808920 (Plb51)	Phospholipase	U	K	DHSMPYSILVANGK	T	1531			21	1			39	1	30	1	26	1	33	2	28	2													28	1	24	3	25	3	34	4
CPAR2_808920 (Plb51)	Phospholipase	U	K	DHSMPYSILVANGK Deamidated (NQ)	T	1532			48	1			47	2	40	1					47	1	41	1	42	1	58	2			67	6	40	1	59	2	44	1
CPAR2_808920 (Plb51)	Phospholipase	U	R	EGDGLSEGEK	N	1020	28	1	37	5	39	2	38	14	38	11	65	14	56	14	58	41	59	19	32	3			34	1	35	18	30	4	36	3	44	5	34	2	49	6
CPAR2_808920 (Plb51)	Phospholipase	U	K	FLISFLNNR	A	1123	58	4	33	2	49	3	53	7	46	5	62	20	57	14	58	15	65	18	44	3	47	4	58	5	36	4	68	4	47	4	70	11	52	11	53	12
CPAR2_808920 (Plb51)	Phospholipase	U	R	FYTGVGTAIVSK	N	1242	42	1	54	1			56	3	69	6	58	2	68	4	78	4	58	5	54	2	53	2	61	1	57	4	46	2	46	2	60	4	76	3	61	4
CPAR2_808920 (Plb51)	Phospholipase	U	K	GTPFPYVPTVDTYLSEDLK	E	2141			51	2	39	2	55	2	52	3	85	11	67	6	75	8	81	7	44	1							39	1			65	5	100	9	88	8
CPAR2_808920 (Plb51)	Phospholipase	U	K	LAYDNAEK	T	922					39	6	34	13	26	4	45	26	47	18	47	23	41	20	32	13	31	4	32	5	28	4	29	3	27	6	37	14	44	18	42	21
CPAR2_808920 (Plb51)	Phospholipase	U	R	LGEEQSEECAK	C	1279	58	16	73	14	62	13	74	23	73	21	71	34	65	30	65	34	66	31	75	38	78	40	59	10	64	26	67	11	66	35	76	23	64	26	71	38
CPAR2_808920 (Plb51)	Phospholipase	U	R	NGYEVMSR	G	955							41	1	31	1					47	1									34	1	32	1	27	1
CPAR2_808920 (Plb51)	Phospholipase	U	R	NGYEVMSR Deamidated (NQ)	G	956											61	2	72	4	60	4	60	4													60	2	54	2	53	3
CPAR2_808920 (Plb51)	Phospholipase	U	K	NYIEAK	Q	736															37	6	26	1															30	2	41	2
CPAR2_808920 (Plb51)	Phospholipase	U	K	WQFTNQGK	G	1008	30	1	22	1	35	1	35	2	33	2	42	4	39	3	42	3	42	4	32	4	23	2	21	1			37	2			36	3	36	3	40	4
CPAR2_402910 (Rbt51)	Iron acquisition Rbt5 family	U	Q	CAQECLK	E	907											43	2	51	1																	53	5	51	1	62	6
CPAR2_402910 (Rbt51)	Iron acquisition Rbt5 family	U	R	IYDLVPQCAQECLK	E	1736	63	24	72	25	55	3	63	45	63	26	71	19	71	16	56	10	64	11	66	26	55	26	64	41	66	46	70	22	71	20	74	85	71	53	56	39
CPAR2_300120 (Csa1)	Iron acquisition Rbt5 family	U	K	ATVAAVAR	T	758																					42	3			40	1					66	4	56	2	56	4
CPAR2_300120 and CPAR2_300110	Iron acquisition Rbt5 family	F	K	LYDGSEVQFR	I	1213																							46	1							38	1
CPAR2_108560 (Ecm33)	Ecm33 family	U	N	ADKVDVNLDELTSAK	N	1617			70	1			72	2	63	2																	63	1
CPAR2_108560 (Ecm33)	Ecm33 family	U	K	EVTDTLDISYNADK	V	1583	81	2	92	4			97	8	106	9	84	6	106	10	102	19	98	10	98	5	88	7	67	1	83	7	88	4	82	5	100	11	109	19	101	18
CPAR2_108560 (Ecm33)	Ecm33 family	U	K	EVTDTLDISYNADKVDVNLDELTSAK	N	2867	23	1	32	1	28	2	81	6	53	3	84	6	86	6	105	11	70	6			62	4	33	1	77	3	32	4			97	7	79	8	119	4
CPAR2_108560 (Ecm33)	Ecm33 family	U	K	EVTDTLDISYNADKVDVNLDELTSAK Deamidated (NQ)	N	2868											94	2			91	4	80	1	71	2	73	1	43	1	55	2			74	1	88	1	62	2	72	3
CPAR2_108560 (Ecm33)	Ecm33 family	U	K	FQCQDQQTTSSSSSK	K	1718	54	1
CPAR2_108560 (Ecm33)	Ecm33 family	U	T	GLQQLYGDLAIR	N	1346			43	1			58	2	64	4	71	3	63	1	86	4	68	5			59	1	61	1	60	3	64	3	69	2	72	2	65	3	85	4
CPAR2_108560 (Ecm33)	Ecm33 family	U	K	IDGDLSCSAFNK	L	1326	85	3	82	2	31	1	82	3	85	3	112	4	50	1	85	4	99	5	66	1							63	2			53	3	76	3	92	7
CPAR2_108560 (Ecm33)	Ecm33 family	U	N	KNEDLEELEFPK	L	1490			47	1			45	1																	47	2
CPAR2_108560 (Ecm33)	Ecm33 family	U	K	LELAQLK	S	814	47	7	42	15	38	20	39	26	44	21	41	17	42	12	39	14	41	12	40	9	31	10	41	7	30	13	39	12	30	11	40	11	44	11	46	10
CPAR2_108560 (Ecm33)	Ecm33 family	U	K	LNTKGDVK	G	874							30	6	26	3
CPAR2_108560 (Ecm33)	Ecm33 family	U	E	LTGLQQLYGDLAIR	N	1560																																			60	3
CPAR2_108560 (Ecm33)	Ecm33 family	U	K	LTTIGGALQISDNDNLK	S	1772	103	42	114	76	108	35	119	95	111	110	105	54	107	55	110	95	101	72	102	36	108	15	111	37	124	42	111	62	110	21	111	51	102	59	114	64
CPAR2_108560 (Ecm33)	Ecm33 family	U	K	LTTIGGALQISDNDNLK Deamidated (NQ)	S	1773															59	1																			47	1
CPAR2_108560 (Ecm33)	Ecm33 family	U	K	NEDLEELEFPK	L	1362	86	14	87	29	86	13	86	37	91	38	76	15	87	15	83	32	95	26	82	16	77	14	82	11	75	23	91	16	70	21	90	16	83	24	86	17
CPAR2_108560 (Ecm33)	Ecm33 family	U	K	NIVLQQVN	S	927															62	2	62	3													58	1	64	4
CPAR2_108560 (Ecm33)	Ecm33 family	U	K	NIVLQQVNSF	N	1161			64	1			54	1	68	3	58	4	62	3	65	4	53	4			60	1			67	3	68	3			67	6	51	2	60	2
CPAR2_108560 (Ecm33)	Ecm33 family	U	F	NVNNNGDIDSIDSGLK Deamidated (NQ)	E	1675									74	1					59	2											74	1							80	5
CPAR2_108560 (Ecm33)	Ecm33 family	U	K	SVGNAIAINK	N	986	66	11	73	18	70	13	85	22	79	28	83	17	77	13	74	18	74	16	81	16	59	14	67	17	61	20	65	17	59	17	67	14	78	14	75	9
CPAR2_108560 (Ecm33)	Ecm33 family	U	K	SVGNAIAINKNEDLEELEFPK	L	2329	64	8	60	12	52	7	60	20	61	12	73	4	46	5	63	9	62	6	38	3	75	5	52	8	74	5	69	7	61	2	60	6	71	6	80	4
CPAR2_108560 (Ecm33)	Ecm33 family	U	K	SVGNAIAINKNEDLEELEFPK Deamidated (NQ)	L	2330			60	1					56	2	68	3			76	3	53	1					43	2	54	1	56	2	63	3	62	2			67	2
CPAR2_108560 (Ecm33)	Ecm33 family	U	K	VAGGFILK	I	803	59	10	67	15	60	10	56	28	65	24	73	11	60	10	64	15	56	9	59	9	50	10	65	11	50	16	55	16	50	13	60	6	59	4	62	10
CPAR2_108560 (Ecm33)	Ecm33 family	U	K	VDVNLDELTSAK	N	1303	50	3	76	8	73	4	99	15	86	13	69	9	79	12	73	18	77	13	87	8	39	1	59	4	82	5	87	7	73	2	77	10	69	14	77	9
CPAR2_108560 (Ecm33)	Ecm33 family	U	K	VFNVNNNGDIDSIDSGLK	E	1920	84	3	94	3	114	4	120	10	112	10	106	7	111	10	105	7	111	8	99	4	82	2	86	5	110	9	94	3	96	3	96	8	105	8	120	11
CPAR2_108560 (Ecm33)	Ecm33 family	U	K	VFNVNNNGDIDSIDSGLK 2 Deamidated (NQ)	E	1922	62	1	93	3			55	1	81	3	106	4	96	7	110	8	110	5					66	1	66	1	81	3			78	1	82	2	84	6
CPAR2_108560 (Ecm33)	Ecm33 family	U	K	VFNVNNNGDIDSIDSGLK Deamidated (NQ)	E	1921	98	6	119	10	87	6	120	19	126	10	90	2	91	5	99	9	99	6	77	5	103	4	109	4	83	6	126	15	107	6	84	7	108	12	72	3
Ecm331/CPAR2_100710	Ecm33 family	U	R	EIAGDVTVINSK	S	1245					56	2	55	2	75	5	78	2	92	4	97	17	75	7	55	1	58	1	71	4	71	7	68	5	61	3	75	4	74	2	78	2
Ecm331/CPAR2_100710	Ecm33 family	U	R	NSQDLELVSLPSFANLVLNR	E	2228							37	4	35	1
Ecm331/CPAR2_100710	Ecm33 family	U	R	NSQDLELVSLPSFANLVLNR Deamidated (NQ)	E	2229									69	1																	69	1
Ecm331/CPAR2_100710	Ecm33 family	U	K	SIVAINLNQLR	S	1240			60	1			59	2	65	4	42	1	94	7	87	8	94	5	44	1	62	2	37	1	71	5	68	2	68	6	81	5	76	5	79	5
CPAR2_603090 (Sun41)	Sun family	U	R	SNYLCEWGADK	A	1342							34	2			26	2	38	1					30	1
CPAR2_806490 (Pir1)	Pir family	U	F	AAGWSISK	D	818					42	1	42	1	50	3					51	6	45	3									50	2							41	1
CPAR2_806490 (Pir1)	Pir family	U	K	ACSSSNNLVMK	L	1210	54	25	56	34	62	49	67	89	59	75	56	44	66	52	58	67	63	73	57	38	39	32	54	35	44	55	56	55	45	47	60	26	60	57	60	44
CPAR2_806490 (Pir1)	Pir family	U	K	ACSSSNNLVMK Deamidated (NQ)	L	1211											43	1	55	3	43	3															51	4	49	2	52	1
CPAR2_806490 (Pir1)	Pir family	U	K	ACSSSNNLVMK Oxidation (M)	L	1226	61	30	73	30	70	20	62	58	78	72	70	60	61	53	64	53	70	50	83	34	51	36	79	74	51	52	59	28	53	30	61	41	65	49	64	57
CPAR2_806490 (Pir1)	Pir family	U	K	ACSSSNNLVMKLEDGVLTDSK	G	2267															24	2	45	2
CPAR2_806490 (Pir1)	Pir family	U	Q	AGSIFAAGWSISK	D	1294													55	1			76	2
CPAR2_806490 (Pir1)	Pir family	U	Y	DENVAAQCNAVK	L	1318											79	3	65	3	78	3	52	3							41	1							56	2	70	3
CPAR2_806490 (Pir1)	Pir family	U	F	DGPPPQAGSIFAAGWSISK	D	1885			80	2	83	5	95	4	71	3	86	4	99	5	93	3	101	9									77	2					64	3	95	4
CPAR2_806490 (Pir1)	Pir family	U	K	DGYLTLGDSK	V	1068	81	20	70	41	74	27	80	80	77	75	75	42	79	43	85	52	87	55	84	37	69	38	84	29	69	66	79	48	75	63	79	24	78	40	94	36
CPAR2_806490 (Pir1)	Pir family	U	Q	FDGPPPQAGSIFAAGWSISK	D	2032			66	1	84	2	94	5	90	3	107	4	92	4	81	8	78	7					72	1			90	4
CPAR2_806490 (Pir1)	Pir family	U	A	GSIFAAGWSISK	D	1223											61	1	55	1	67	2	88	4															57	1	73	3
CPAR2_806490 (Pir1)	Pir family	U	D	GYLTLGDSK	V	953													57	1	60	4	65	4																	50	1
CPAR2_806490 (Pir1)	Pir family	U	S	IFAAGWSISK	D	1079									48	1	60	4	56	3	59	4	52	2							63	2	48	1
CPAR2_806490 (Pir1)	Pir family	U	R	IGAIVANR	Q	812	69	21	69	32	71	86	74	93	72	76	69	33	68	40	66	54	64	55	61	28	56	26	61	28	63	40	64	45	56	40	67	13	72	41	69	34
CPAR2_806490 (Pir1)	Pir family	U	M	KLEDGVLTDSK	G	1204									57	1	61	2	67	2	66	5	76	2							41	1	57	1					63	1	54	2
CPAR2_806490 (Pir1)	Pir family	U	K	LEDGVLTDSK	G	1076	84	30	79	38	95	60	84	138	89	108	80	43	83	57	88	81	88	63	84	40	75	44	81	36	73	69	89	56	75	57	84	25	84	41	88	36
CPAR2_806490 (Pir1)	Pir family	U	K	LEDGVLTDSKGR	I	1289	41	1	59	2			78	11	68	5			75	6	81	5	70	5	49	1	58	3	38	2	60	4	61	4	62	9
CPAR2_806490 (Pir1)	Pir family	U	K	LKIIDFVDC	C-term	1122							50	3	48	1	81	5	85	8	72	2	91	3	43	1					49	3	33	1	59	2			70	4	65	4
CPAR2_806490 (Pir1)	Pir family	U	N	LYDENVAAQCNAVK	L	1594					68	1	96	1	79	1	55	2	76	4	64	4	96	3									79	1	68	1	45	1	63	3	63	3
CPAR2_806490 (Pir1)	Pir family	U	Y	NLYDENVAAQCNAVK	L	1708							75	2																					66	1
CPAR2_806490 (Pir1)	Pir family	U	R	QFQFDGPPPQAG	S	1288									62	4	63	3	61	4	59	1	64	3							41	1	62	3			61	2	63	4	52	2
CPAR2_806490 (Pir1)	Pir family	U	R	QFQFDGPPPQAGSIF	A	1635			47	2			70	10	72	5	58	7			70	5	67	5	52	2	53	2			59	6	54	3	49	4					59	5
CPAR2_806490 (Pir1)	Pir family	U	R	QFQFDGPPPQAGSIFAA	G	1777	43	1	55	1			83	11	75	5	56	3	71	6	58	4	82	2	40	1	44	1			67	2	75	5	68	2	60	3	49	3	61	2
CPAR2_806490 (Pir1)	Pir family	U	R	QFQFDGPPPQAGSIFAAG	W	1834											57	2	55	1	69	5	70	3
CPAR2_806490 (Pir1)	Pir family	U	R	QFQFDGPPPQAGSIFAAGWSISK	D	2435	119	20	115	13	121	22	132	24	113	15	114	23	124	26	97	14	114	30	131	12	95	3	122	15	86	5	126	21	95	3	106	16	89	12	119	25
CPAR2_806490 (Pir1)	Pir family	U	R	QFQFDGPPPQAGSIFAAGWSISK Deamidated (NQ)	D	2436			75	1	88	5	96	5	65	2	97	8	101	5	85	13	90	13	78	2	62	1	103	4	97	1	65	4	42	1	79	2	46	1
CPAR2_806490 (Pir1)	Pir family	U	L	SGDFYNLYDENVAAQCNAVK	L	2277			89	1	101	2	114	2	96	1			69	1	93	3	114	2	93	1			88	1			114	1							89	2
CPAR2_806490 (Pir1)	Pir family	U	G	SIFAAGWSISK	D	1166	49	1	61	3			64	4	61	4	81	13	81	15	81	12	81	17	60	2	60	2	53	1	57	3	61	4	64	7	85	3	85	6	85	7
CPAR2_806490 (Pir1)	Pir family	U	S	SSNNLVMK	L	892			42	1			54	1			58	4	53	2	61	6	63	6													41	1	60	4	61	4
CPAR2_806490 (Pir1)	Pir family	U	C	SSSNNLVMK	L	978											55	10	50	10	51	6	65	14															57	7	48	4
CPAR2_806490 (Pir1)	Pir family	U	C	SSSNNLVMK Oxidation (M)	L	994											54	5	65	4	66	4	70	3													62	1	62	4	56	4
CPAR2_806490 (Pir1)	Pir family	U	K	VFYQCLSGDFYN	L	1512													49	1	63	2	83	4
CPAR2_806490 (Pir1)	Pir family	U	K	VFYQCLSGDFYNLYDENVAAQCNAVK	L	3087			27	1	38	2	29	5	43	5	37	7	29	1	43	11	41	3	28	2			38	1	61	2	43	2			25	1	48	2	60	6
CPAR2_806490 (Pir1)	Pir family	U	K	VFYQCLSGDFYNLYDENVAAQCNAVK Deamidated (NQ)	L	3088											56	1	58	2			60	3							44	1					44	1
Pga30/CPAR2_402000	Pga30 family	U	N-term	AIRPVQFFATSDNEEVNGK	G	2121	101	3	78	6	112	13	112	6	78	5	82	3	93	4	115	22	67	2	103	12	77	3	114	13	94	16	96	11	97	8	101	8	127	13	120	13
Pga30/CPAR2_402000	Pga30 family	U	N-term	AIRPVQFFATSDNEEVNGK Deamidated (NQ)	G	2122	107	2	93	2	98	8	63	4	62	1	89	5	113	10	115	21	110	10	95	10	134	5	123	28	136	40	105	5	114	16	107	17	95	7	118	13
Pga30/CPAR2_402000	Pga30 family	U	F	ATSDNEEVNGK Deamidated (NQ)	G	1164											49	1	64	5	68	4			66	6			73	5	45	2			48	1	77	5			70	4
Pga30/CPAR2_402000	Pga30 family	U	F	FATSDNEEVNGK	G	1310					61	9	45	1	42	1					69	4							73	6	50	1	42	1					54	1
Pga30/CPAR2_402000	Pga30 family	U	F	FATSDNEEVNGK Deamidated (NQ)	G	1311	51	1			67	7	53	3			65	6	76	7	88	26	80	21	60	5	41	1	68	11	81	21	65	3	63	13	88	25	81	24	81	20
Pga30/CPAR2_402000	Pga30 family	U	F	FLGAGQTLQYNDEAR	V	1682					61	1					56	2	78	2	94	5	104	4	94	7	61	1	83	10	86	5	90	2	80	2	87	6	96	4	99	5
Pga30/CPAR2_402000	Pga30 family	U	L	GAGQTLQYNDEAR	V	1422					70	3							62	2	58	3	54	2	63	6			77	6	42	2					52	2	73	3	64	4
Pga30/CPAR2_402000	Pga30 family	U	K	GLYSTHEGAGIN	Y	1218															53	5
Pga30/CPAR2_402000	Pga30 family	U	K	GLYSTHEGAGINYF	F	1528															51	2							51	5	41	1					43	1			48	1
Pga30/CPAR2_402000	Pga30 family	U	K	GLYSTHEGAGINYFFLGAGQTLQYNDEAR	V	3191	57	2			51	11	21	1			34	2			62	9	61	4	72	8			52	18	56	5	45	5	26	2	61	7	38	1	70	3
Pga30/CPAR2_402000	Pga30 family	U	K	GLYSTHEGAGINYFFLGAGQTLQYNDEAR Deamidated (NQ)	V	3192	40	1			55	4	50	1			62	1	67	3	78	3			42	1	50	1	46	1									52	2	55	1
Pga30/CPAR2_402000	Pga30 family	U	F	LGAGQTLQYNDEAR	V	1535					75	2	61	2							71	5	64	2	66	7	47	1	64	7			72	2			65	4	66	1	69	7
Pga30/CPAR2_402000	Pga30 family	U	R	PVQFFATSDNEEVNGK	G	1781					55	1							67	2	101	8	73	1					82	2	60	1			64	2	106	6	77	6	82	8
Pga30/CPAR2_402000	Pga30 family	U	R	PVQFFATSDNEEVNGK Deamidated (NQ)	G	1782					73	1	54	1	45	1	79	6	105	3	78	3	101	6	69	2			81	3	80	2	68	2	86	1	77	5	82	3	96	3
Pga30/CPAR2_402000	Pga30 family	U	Q	TLQYNDEAR	V	1109													47	2	53	6									51	1					50	1	62	5
Rhd3/CPAR2_402010	Pga30 family	U	N-term	AVRPVQLFASSDNK	E	1531	47	2					42	1			71	4	65	4	70	8	77	6
Rhd3/CPAR2_402010	Pga30 family	U	R	PVQLFASSDNK	E	1205											57	1			77	8	71	5
CPAR2_402000 and CPAR2_402010	Pga30 family	F	K	AGGEGSIPLTVSAK	F	1286	57	14	63	8	69	21	54	19	53	10	57	12	60	13	76	39	53	9	65	31	64	13	68	63	59	38	56	18	65	23	66	21	63	13	63	16
CPAR2_402000 and CPAR2_402010	Pga30 family	F	K	NINDPYR	Y	890	31	11	32	1	29	12	33	4			37	10	46	15	41	31	37	14	30	17	32	13	35	24	37	30	29	3	41	23	37	7	42	17	34	21
CPAR2_402000 and CPAR2_402010	Pga30 family	F	R	VVYIELNSQPPAK	Q	1457	71	23	69	12	77	32	76	26	68	10	75	11	61	13	75	31	65	12	75	19	72	12	69	49	74	30	80	18	75	21	73	16	77	18	74	12
CPAR2_402000 and CPAR2_402010	Pga30 family	F	R	VVYIELNSQPPAK Deamidated (NQ)	Q	1458	63	1					49	1	57	1	66	4	72	7	64	8	71	6	41	1	65	9	65	3	74	20	57	1	72	23	51	6			69	6
CPAR2_402000 and CPAR2_402010	Pga30 family	F	R	YSESVFAVVK	A	1128	49	10	43	5	60	15	50	11	47	10	60	7	58	10			37	1	58	17	51	12	67	38	56	34	55	14	46	25	55	20	57	11	57	14
CPAR2_603340 (Pga59)	Pga59/Pga62 family	U	K	APETSAPASK	A	958	50	9	45	12	50	5	50	8	57	10													50	10	33	2	60	13	45	1
CPAR2_503650 (Tos1)	Unknown function	U	R	EGTVAHHGFGGSNK	I	1397	35	2	43	4	38	1	35	4	44	1									34	1							25	1
CPAR2_503650 (Tos1)	Unknown function	U	K	TGCGELDLFEILSSGSNK	L	1926			90	2	86	2	99	1	71	2									92	1			43	1			46	1
CPAR2_503650 (Tos1)	Unknown function	U	R	TLQYGDSSCSCWK	T	1591	61	3	86	3			67	1	65	3	70	5			70	4			51	1					48	1	77	2	58	1	68	4			76	5
CPAR2_301540 (Ssr1)	Unknown function	U	L	ACVAQVQK	S	902			58	2	56	1	57	11	58	5	52	12	48	5	53	4	51	5	60	2			59	4			52	2			49	4	49	3	54	4
CPAR2_301540 (Ssr1)	Unknown function	U	A	CICSNEGDDVK	S	1295	46	2	59	11	47	1	49	5	49	1	60	7	64	7	66	9	65	6			44	1			51	6	49	1	43	2	61	5	75	12	66	12
CPAR2_301540 (Ssr1)	Unknown function	U	N	DLACICSNEGDDVK	S	1595	47	1	53	2			68	1			101	7	76	4	92	5	83	5			49	1							45	1	68	5	65	4	66	5
CPAR2_301540 (Ssr1)	Unknown function	U	C	ICSNEGDDVK	S	1136	50	5	63	6	46	1	62	12	67	7	70	20	60	21	66	29	70	31	45	1	51	3	67	3	57	8	51	7	55	13	72	10	70	35	70	18
CPAR2_301540 (Ssr1)	Unknown function	U	L	LACVAQVQK	S	1016			50	3			45	2			53	3	65	3			50	2															56	2
CPAR2_301540 (Ssr1)	Unknown function	U	P	PACLLACVAQVQK	S	1457	84	2	74	2			82	4	89	6	80	6	77	6	73	4	77	4	81	5	87	2					89	3	84	3	69	3	71	4	89	3
CPAR2_301540 (Ssr1)	Unknown function	U	K	SCLDNICPNGDADTAK	K	1750	76	10	84	7	81	7	95	8	84	11	94	8	73	6	84	11	88	11	73	9	86	4	105	5	94	8	77	4	83	7	100	7	78	4	78	9
CPAR2_301540 (Ssr1)	Unknown function	U	K	SCLDNICPNGDADTAK Deamidated (NQ)	K	1751	94	20	96	16	86	14	82	26	94	12	77	18	103	13	87	8	103	15	104	22	94	16	106	11	94	12	94	20	100	13	78	16	81	17	103	14
CPAR2_301540 (Ssr1)	Unknown function	U	K	SCLDNICPNGDADTAKK	A	1878	69	23	61	26	78	14	73	14	66	16	60	18	68	14	64	19	75	14	77	13	76	17	62	13	65	16	64	14	68	18	73	14	64	16	63	14
CPAR2_301540 (Ssr1)	Unknown function	U	K	SCLDNICPNGDADTAKK Deamidated (NQ)	A	1879	78	32	71	28	83	27	78	48	89	16	79	26	71	22	95	20	77	20	89	31	86	23	79	31	80	36	89	47	80	34	68	14	75	15	79	23
CPAR2_301540 (Ssr1)	Unknown function	U	C	SGLNDLACICSNEGDDVK	S	1966			67	1			84	1	97	1	44	1	78	2	68	1	77	1							66	1	97	1					65	4	57	2
CPAR2_301540 (Ssr1)	Unknown function	U	K	SSSQCSGLNDLAC	I	1397									53	1	54	3	45	1			60	3									53	1					68	2	52	4
CPAR2_301540 (Ssr1)	Unknown function	U	K	SSSQCSGLNDLACICSNEGDDVK	S	2515	83	9	94	9	87	4	87	6	98	5	86	12	100	11	88	17	85	12			93	2	94	5	95	5	71	7	93	3	89	10	81	14	91	9
CPAR2_301540 (Ssr1)	Unknown function	U	K	SSSQCSGLNDLACICSNEGDDVK Deamidated (NQ)	S	2516	48	3			51	2	76	3	51	1	55	1	83	1	49	2			66	2	53	1	95	1			77	2	48	1	56	2	53	1
CPAR2_301540 (Ssr1)	Unknown function	U	N-term	TPPACLLACVAQVQK	S	1655	87	26	120	100	108	73	93	117	97	88	105	58	112	60	95	66	92	60	82	52	95	39	97	37	109	55	101	84	96	49	83	38	94	71	119	50
CPAR2_200370 Pga1)	Unknown function	U	N-term	LANQGAGGGAGGDAK	T	1243			45	1	53	1	63	2											54	2			77	3			54	2
CPAR2_400900 (Pga53)	Unknown function	U	K	DEDDQAEVAK	K	1119									55	2											31	1					30	1	45	1
CPAR2_701390	Unknown function	U	R	CECSLDDEYYVK	W	1580											50	2	42	1	69	4	70	6			45	1													49	1
CPAR2_701390	Unknown function	U	K	IQEDRCECSLDDEYYVK	W	2221															45	3
CPAR2_701390	Unknown function	U	K	MNIAACR	D	834																					31	1
CPAR2_701390	Unknown function	U	K	MNIAACR Oxidation (M)	D	850													36	2	46	1
CPAR2_701390	Unknown function	U	R	VELQPELLK	S	1068											36	2	42	4	41	2	41	5			34	2
CPAR2_805040	Unknown function	U	K	TQCETGQGYNVK	L	1384															53	3	66	6															34	2	64	4
CPAR2_403880	Unknown function	U	K	IYQPADMAGENIAK	T	1520											75	5	54	2
CPAR2_405510 (Nce102)	Unknown function	U	R	VHSCGNQDYLDSNK	I	1636																															55	5	63	5	49	4
aUnique (U) or Family (F) peptide.
bResidue before (B) or after (A) peptide.
cHighest Mascot score for peptide and number of times identified in sample. Peptides in purple color are identified with semiTryp settings and allowing N/Q deamidation.

## Sheet: S2_Stat&BF_pep count
Supplementary Table S2. Semi-quantitative peptide counting of CW proteomic data from C. parapsilosis clinical isolates.
Identified protein (Proposed name)	Ortholog (o) or closest homolog (h) in C. albicans	Functional class or family	LBF	IBF				HBF
			PEU501	PEU582		PEU651		PEU486		PEU495		PEU496		PEU586
			Stat.a	Stat.	B_PS	Stat.	B_PS	Stat.	B_PS	Stat.	B_PS	Stat.	B_PS	Stat.	B_PS	B_S
Putative adhesins			DP/TP peptidesb
CPAR2_404780 (Als11)	Als1/C6_03700W (h)	Als family	1/1	2/3	2/8			8/77	7/62	5/47	8/55	6/87	6/63	9/67	9/93	9/58
CPAR2_404790 (Als6)	Als6/C3_06190C (o)	Als family		4/10	2/4			5/11	4/5	5/13	4/10	8/13	3/7
Als7/CPAR2_404800	Als7/C3_06320W (o)	Als family	1/1					11/80	9/43	7/45	5/36	9/55	7/43	6/27	10/81	9/46
Non-unique Als peptides		Als family	3/15	2/29	5/41	1/1	1/1	20/277	16/301	16/165	13/222	17/265	17/261	15/234	18/367	17/320
CPAR2_600430 (Hyr31)	Hyr3/C5_00730W (h)	Iff/Hyr family							1/3				1/4
Non-unique Iff/Hyr peptides		Iff/Hyr family			2/8				7/19	5/8	7/35	2/2	8/57	1/2	5/17	4/13
Rbt1/CPAR2_403510	Rbt1/C4_03520C (o)	Hwp1 family	1/6	1/4	2/14	1/8	1/5	6/87	5/58	7/127	5/86	7/137	5/109	7/125	6/126	7/63
Ywp1/CPAR2_806670	Ywp1/C2_08590W (o)	Hwp1 family	1/94	1/22	1/15	1/24	1/21	1/32	1/34	1/28	1/40	1/33	1/38	1/11	1/14	1/9
Sum different/total putative adhesin peptides			7/117	10/68	14/90	3/33	3/27	51/564	50/525	46/433	43/484	50/592	48/582	39/466	49/698	47/509
Carbohydrate active enzymes
CPAR2_302140 (Phr1)	Phr1/C4_04530C (o)	Gas/Phr family	10/29	13/61	13/60	16/127	17/129	5/6	5/10	4/10	5/13	3/4	3/3	6/12	10/30	11/42
CPAR2_109660 (Phr2)	Phr2/C1_00220W (o)	Gas/Phr family	19/192	14/136	16/132	14/170	10/101	13/89	17/92	10/65	13/116	16/130	14/119	16/108	15/112	17/125
CPAR2_100110 (Pga4)	Pga4/C5_05390C (o)	Gas/Phr family	14/109	16/162	16/146	14/157	13/133	14/216	12/172	13/103	13/167	14/121	13/154	16/177	17/172	14/171
CPAR2_407410 (MP65)	MP65/C2_10030C (o)	Bgl2 family	11/59	13/140	10/55	4/60	6/43	9/42	5/30	7/27	6/36	9/46	4/27	9/93	10/56	11/80
CPAR2_401600 (Bgl2)	Bgl2/C4_02250C (o)	Bgl2 family	8/11	6/23	8/38	7/16	7/29	4/6	3/3	4/6	5/8	5/6	5/5	5/16	6/20	7/26
CPAR2_400860 (Crh11)	Crh11/C4_02900C (o)	Crh family	8/229	9/267	10/303	7/82	8/118	9/185	8/208	7/95	8/241	8/153	8/156	7/163	9/216	8/207
CPAR2_503190 (Utr2)	Utr2/C3_01730C (o)	Crh family	4/36	3/29	4/35	5/82	4/73	4/34	3/38	3/17	3/61	3/18	3/36	4/32	4/36	4/47
CPAR2_502140 (Cht2)	Cht2/C5_04130C (o)	Chitinase	23/403	26/311	22/192	26/270	23/260	28/455	21/227	27/479	23/287	28/529	23/235	27/324	24/317	27/296
CPAR2_502130 (Cht21)	Cht2/C5_04130C (h)	Chitinase						1/1	5/20	4/11	8/39			4/6	2/4	8/20
CPAR2_502120 (Cht22)	Cht2/C5_04130C (h)	Chitinase							1/2		2/3					1/2
Other enzymes
CPAR2_213080 (Sod4)	Sod4/C2_00660C (o)	Superoxide dismutase	1/1				4/8	1/1	1/2		1/5	1/1	1/6
CPAR2_102610 (Sap9)	Sap9/C3_03870C (o)	Aspartic protease	1/2		1/2	3/9	2/6		3/4		1/1	2/2	2/3	1/2	1/1	1/3
CPAR2_702730 (Sap91)	Sap9/C3_03870C (h)	Aspartic protease	5/9	9/46	10/46	13/192	13/191	11/94	11/150	8/12	11/128	10/51	11/139	8/50	12/72	9/63
CPAR2_702720 (Sap92)	Sap9/C3_03870C (h)	Aspartic protease		3/9	3/9	2/6	2/6	4/10	3/13
CPAR2_500920 (Sap10)	Sap10/C4_04470W (o)	Aspartic protease			1/3	1/1	1/2		1/1
Non-unique Sap peptides		Aspartic protease	1/1	1/18	1/12	2/27	2/31	2/14	2/19		1/10	1/4	1/17	1/4	1/18	1/11
CPAR2_804680 (Plb5)	Plb5/C1_08230C (o)	Phospholipase	7/42	6/29	7/34	9/53	6/39	6/15	5/11	5/10	6/24	6/23	6/26	6/34	6/26	6/28
CPAR2_808920 (Plb51)	Plb5/C1_08230C (h)	Phospholipase	10/55	10/121	10/97	13/145	11/114	9/68	7/58	7/25	8/67	10/30	9/57	11/72	11/81	11/106
Non-enzymatic or Unknown function
CPAR2_402910 (Rbt51)	Rbt5/C4_00130W (h)	Rbt5 family	1/26	2/21	2/17	1/10	1/11	1/26	1/26	1/41	1/46	1/22	1/20	2/90	2/54	2/45
CPAR2_300120 (Csa1)	Csa1/C7_00090C (o)	Rbt5 family							1/3		1/1			1/4	1/2	1/4
Non-unique Rbt5 fam. peptides		Rbt5 family								1/1				1/1
CPAR2_108560 (Ecm33)	Ecm33/C1_03190C (o)	Ecm33 family	19/299	17/168	15/165	20/279	18/208	12/114	14/89	15/111	17/161	18/178	13/107	18/163	17/195	20/192
Ecm331/CPAR2_100710	Ecm331/C5_02460C (o)	Ecm33 family	4/11	2/3	2/11	2/25	2/12	2/2	2/3	2/5	2/12	3/8	2/9	2/9	2/7	2/7
CPAR2_603090 (Sun41)	Sun41/C6_00820W (o)	Sun family		1/2	1/1			1/1
CPAR2_806490 (Pir1)	Pir1/C2_08870C (o)	Pir family	21/465	26/334	30/364	31/444	32/453	14/201	11/188	12/227	18/314	21/291	14/267	16/164	21/287	24/290
Pga30/CPAR2_402000	Pga30/C4_04070C (o)	Pga30 family	4/8	8/26	10/40	15/126	9/52	10/64	6/12	13/115	12/97	8/31	8/45	12/87	12/70	12/82
Rhd3/CPAR2_402010	Rhd3/C4_04050C (o)	Pga30 family		2/5	1/4	2/16	2/11
Non-unique Pga30 fam. peptides		Pga30 family	4/31	5/44	5/58	4/109	5/42	5/85	5/59	5/177	5/152	5/54	5/115	5/70	4/59	5/69
CPAR2_603340 (Pga59)	Pga59/C4_02370C (o)	Pga59/Pga62 family	1/10							1/10	1/2	1/13	1/1
CPAR2_503650 (Tos1)	Tos1/C3_01550C (o)	Unknown function	3/6	1/5		1/4		3/3		1/1	1/1	3/4	1/1	1/4		1/5
CPAR2_301540 (Ssr1)	Ssr1/C7_00860W (o)	Unknown function	13/170	15/200	15/176	13/195	14/189	9/137	11/109	9/110	9/147	13/193	11/144	12/128	15/204	13/167
CPAR2_200370 (Pga1)	Pga1/CR_10480W (o)	Unknown function						1/2		1/3		1/2
CPAR2_400900 (Pga53)	Pga53/C4_01360W (o)	Unknown function	1/2						1/1			1/1	1/1
CPAR2_701390	No hits	Unknown function		2/4	3/7	4/10	2/11		3/4							1/1
CPAR2_805040	C1_10170W (o)	Unknown function				1/3	1/6								1/2	1/4
CPAR2_403880	No hits	Unknown function		1/5	1/2
CPAR2_405510 (Nce102)	NCE102/C3_04910C (o)	Unknown function												1/5	1/5	1/4
Sum of different/total non-adhesin peptides			193/2206	208/2160	213/2000	225/2605	212/2261	178/1871	165/1550	160/1661	181/2139	191/1915	160/1693	192/1818	204/2046	219/2097
aStat., Stationary phase; B_PS, Polystyrol biofilm; B_S, Silicone biofilm.
bDP, Number of different peptides identified; TP, total number of peptides identified.
